# Supplementary material for: Mesocosm Evaluation of the Safety of the Use of Reclaimed Water Regarding Emerging Pollutants in Murcia, Spain
Source: MDPI journal article supplement (doi:10.3390/su15054536), 2023-03-03
Supplement: s1 [file s1]

Archive with 1 entries (1 files):
- sustainability-2209159-supplementary.pdf
